# Supplementary material
Source: publisher figshare collection journal article supplement (https://acs.figshare.com/ndownloader/files/12403613)
Supplement: Supplementary file 1 [file 12403613]

## SUPPORTING INFORMATION

### **Challenges in transitioning cocrystals from bench to bedside: Dissociation in prototype drug product environment**

Sampada Koranne<sup>§</sup>, Anasuya Sahoo<sup>§</sup>, Joseph F. Krzyzaniak<sup>†</sup>, Suman Luthra<sup>†</sup>, Kapildev K. Arora<sup>\*†</sup>,

Raj Suryanarayanan<sup>§\*</sup>

<sup>§</sup>Department of Pharmaceutics, College of Pharmacy, University of Minnesota, 9-177 WDH, 308 Harvard Street S.E., Minneapolis, Minnesota 55455, United States of America

<sup>†</sup>Pfizer Worldwide Research & Development, Groton Laboratories, Groton, CT 06340, United States of America

Corresponding author information

\*Raj Suryanarayanan (Sury), PhD

Professor and William and Mildred Peters Endowed Chair

**Address:** Department of Pharmaceutics, College of Pharmacy  
University of Minnesota, 9-177 WDH, 308 Harvard Street S.E.  
Minneapolis, MN 55455, USA

**Office Phone:** 612-624-9626

**Fax:** 612-626-2125

**E-mail:** [surya001@umn.edu](mailto:surya001@umn.edu)

\*Kapildev Arora, PhD

**Address:** 558 Eastern Point Road, Building 156A Office # 362B

Drug Product Design/Materials Science

Pfizer Worldwide R&D

Groton, CT 06340, USA

**Office Phone:** 860-441-0412

**E-mail:** [kapildev.arora@pfizer.com](mailto:kapildev.arora@pfizer.com)

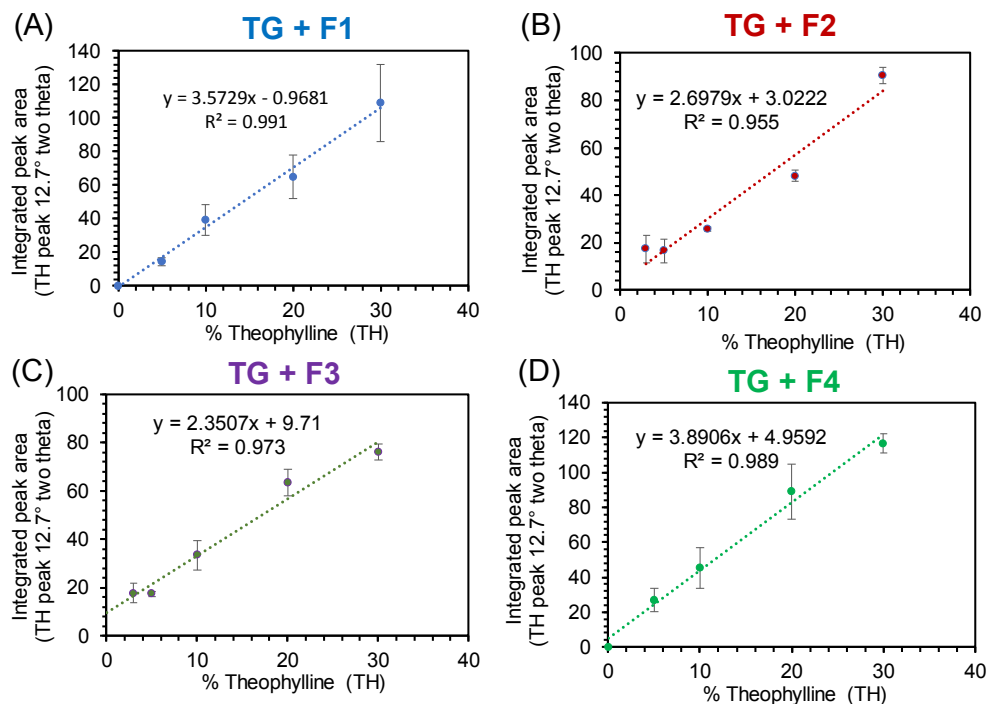

**Figure S1.** Plot of the intensity of the 12.7° 2θ peak of TH as a function of TH concentration in calibration tablets of (A) TG + F1, (B) TG + F2, (C) TG + F3, and (D) TG + F4.

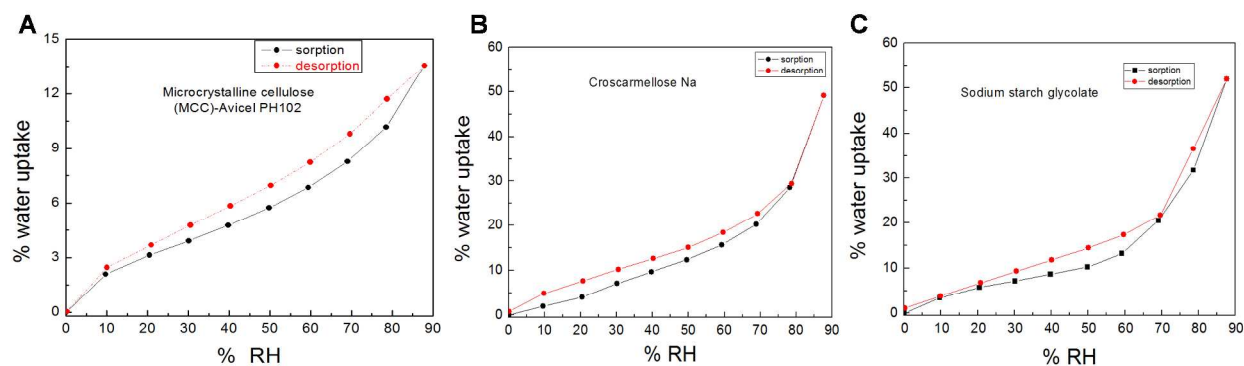

**Figure S2.** Water sorption-desorption isotherms of (A) microcrystalline cellulose, (B) croscarmellose sodium and, (C) sodium starch glycolate at 25 °C.

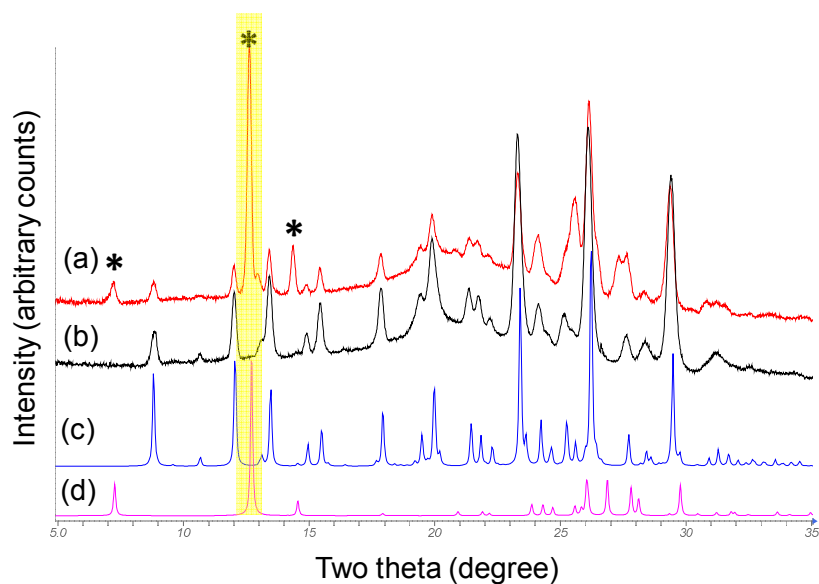

**Figure S3.** Overlay of XRD patterns of binary compacts of TG prepared with CCS. The XRD patterns of freshly prepared compacts and after storage at 40 °C/75% RH for 1 day are presented in (b) and (a) respectively. The reference patterns of TG cocrystal and theophylline are presented in (c) and (d), respectively.

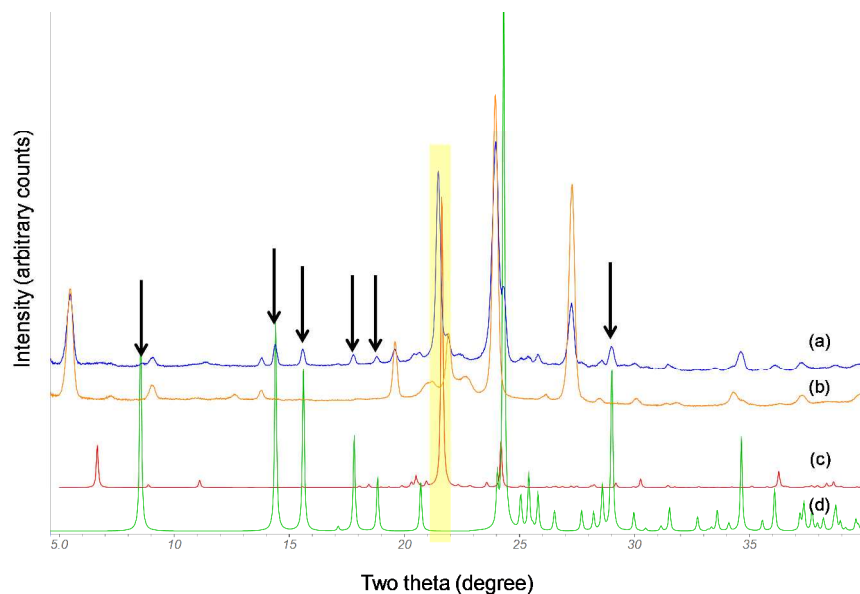

**Figure S4.** Overlay of XRD patterns of binary compacts of GA (21.15 mg) prepared with MgSt (50.00 mg). The XRD patterns of freshly prepared compacts and after storage at 40 °C/75% RH for two days are presented in (b) and (a) respectively. The reference patterns of stearic acid (CSD ref code STARAC01) and glutaric acid-magnesium-(H<sub>2</sub>O)<sub>4</sub> complex (CSD ref code NOKFOI), are presented in (c) and (d), respectively. The arrows point several peaks matching with glutaric acid-magnesium (H<sub>2</sub>O)<sub>4</sub> complex. One characteristic peak for stearic acid observed as a consequence of the reaction is highlighted.
